# Supplementary material for: Probing the charging mechanisms of carbon nanomaterial polyelectrolytes
Source: Royal Society of Chemistry journal article supplement (doi:10.1039/c4fd00043a), 2014-01-01
Supplement: c4fd00043a1.pdf [file c4fd00043a1.pdf]

## **Electronic Supplementary Information**

### **Probing the charging mechanisms of carbon nanomaterial polyelectrolytes**

Stephen A. Hodge, Hui Huang Tay, David B. Anthony, Robert Menzel, David J. Buckley, Patrick L. Cullen, Neal T. Skipper, Christopher A. Howard, and Milo S. P. Shaffer

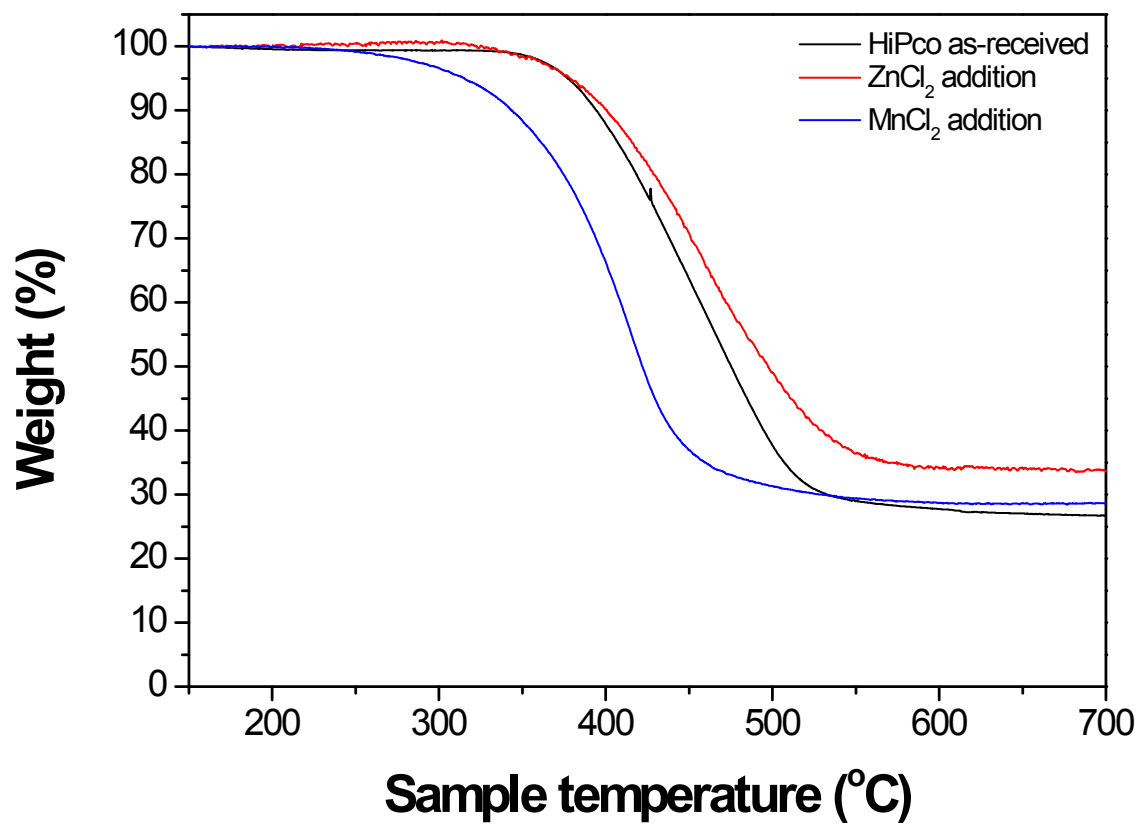

**Fig. S1** Oxidative thermogravimetric analysis (TGA) of raw HiPco SWCNTs and sodium nanotubide (NaC<sub>10</sub>) dispersions following reaction with manganese and zinc chloride salts.

**Table S1** TGA and ICP-AES results for graphenide ( $KC_8$  and  $KC_{24}$ ) reactions with metal salts/complexes

| M<br>(compound)                          | Reaction<br>stoichiometry | TGA data       |                             |                 | ICP-AES data              |                      |                       | M:C<br>molar ratio |
|------------------------------------------|---------------------------|----------------|-----------------------------|-----------------|---------------------------|----------------------|-----------------------|--------------------|
|                                          |                           | Carbon<br>mass | Carbon<br>molar<br>quantity | Residue<br>mass | M in 100<br>mL 10%<br>HCl | M mass in<br>residue | M molar<br>quantity   |                    |
|                                          | M:K                       | mg             | mol                         | mg              | mg/L                      | mg                   | mol                   | C/M                |
| <b><math>KC_8</math> reactions</b>       |                           |                |                             |                 |                           |                      |                       |                    |
| <b>Mn</b><br>( <b>MnCl<sub>2</sub></b> ) | 0.5:1                     | 0.77157        | $6.42 \times 10^{-5}$       | 0.17341         | 0.076                     | 0.0076               | $1.38 \times 10^{-7}$ | 464.3635           |
| <b>Zn</b><br>( <b>ZnCl<sub>2</sub></b> ) | 0.5:1                     | 0.69236        | $5.76 \times 10^{-5}$       | 0.15989         | 0.351                     | 0.0351               | $5.37 \times 10^{-7}$ | 107.3716           |
| <b>Zn</b><br>( <b>ZnCl<sub>2</sub></b> ) | 3:1                       | 0.89250        | $7.43 \times 10^{-5}$       | 0.19643         | 0.528                     | 0.0528               | $8.08 \times 10^{-7}$ | 92.0114            |
| <b>Zn</b><br>( <b>ZnCl<sub>2</sub></b> ) | 10:1                      | 0.93699        | $7.80 \times 10^{-5}$       | 0.15494         | 0.581                     | 0.0581               | $8.89 \times 10^{-7}$ | 87.7859            |
| <b>Cu</b><br>( <b>CuCl<sub>2</sub></b> ) | 0.5:1                     | 1.50930        | $1.26 \times 10^{-4}$       | 0.22781         | 0.090                     | 0.0090               | $1.42 \times 10^{-7}$ | 887.2397           |
| <b>Cu</b><br>( <b>CuMes</b> )            | 1:1                       | 0.33752        | $2.81 \times 10^{-5}$       | 0.40138         | 1.753                     | 0.17532              | $2.76 \times 10^{-6}$ | 10.1854            |
| <b><math>KC_{24}</math> reactions</b>    |                           |                |                             |                 |                           |                      |                       |                    |
| <b>Mn</b><br>( <b>MnCl<sub>2</sub></b> ) | 0.5:1                     | 0.45004        | $3.75 \times 10^{-5}$       | 0.10301         | 0                         | 0                    | 0                     | --                 |
| <b>Zn</b><br>( <b>ZnCl<sub>2</sub></b> ) | 0.5:1                     | 1.07776        | $8.97 \times 10^{-5}$       | 0.16023         | 0.12                      | 0.012                | $1.84 \times 10^{-7}$ | 488.8862           |

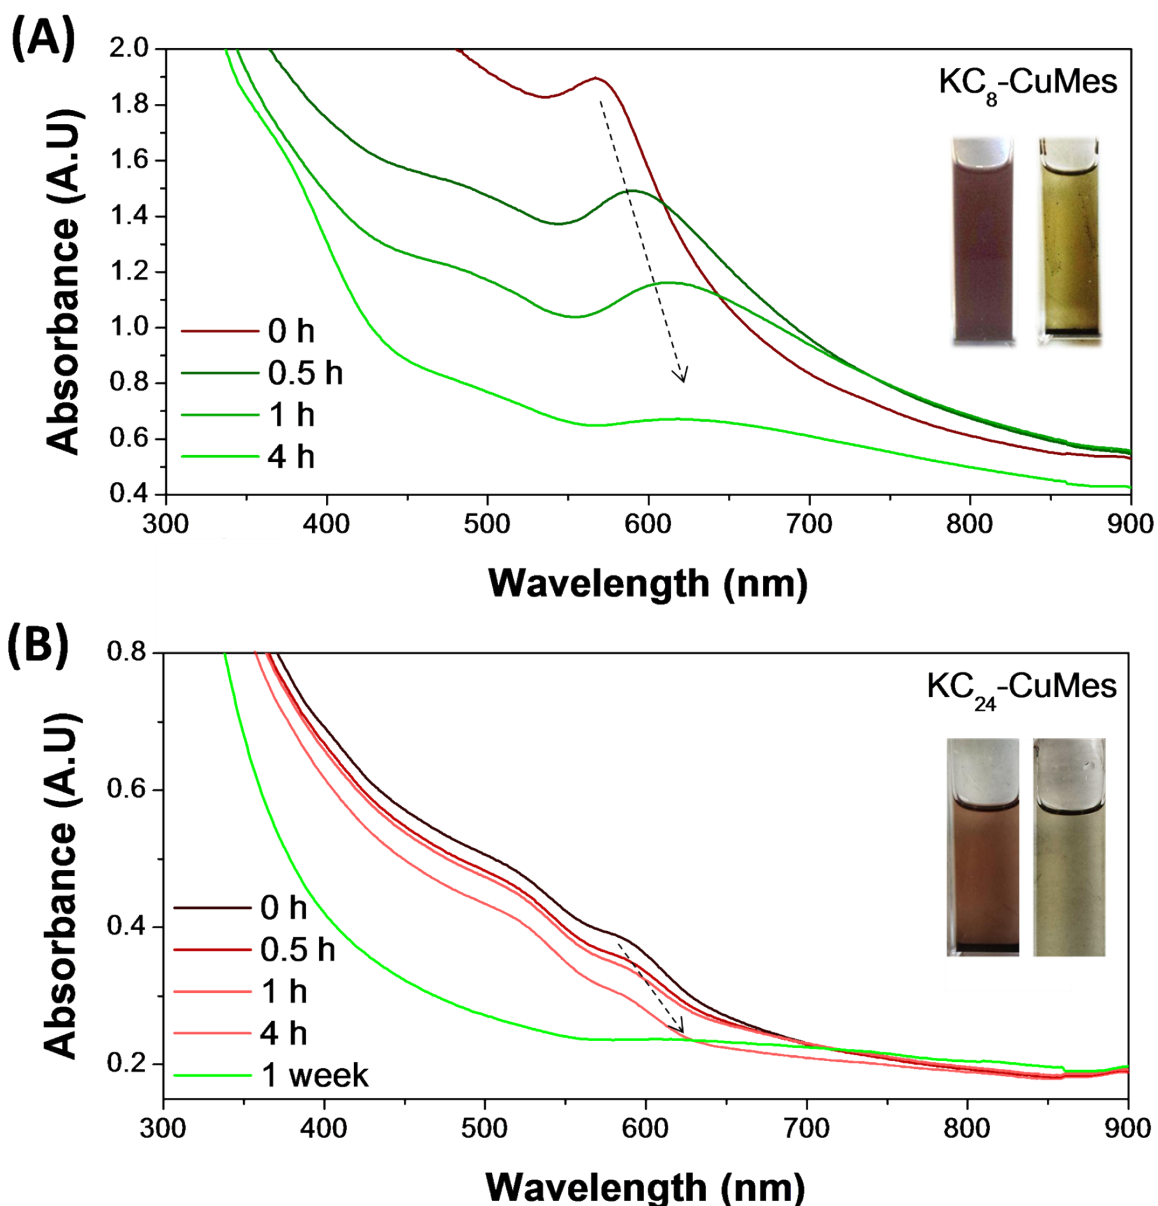

**Fig. S2** UV-vis absorption spectra for Cu NPs generated by the reduction of CuMes by (A)  $KC_8$  and (B)  $KC_{24}$  after exposure to air. The Cu metal plasmon at 570 nm is visible in both spectra. The reduction in absorption intensity over time is due to the sedimentation of graphene particles. Upon exposure to air there is a surface plasmon shift for the  $KC_8$  generated Cu NPs due to rapid oxidation, also observed by a solution colour change from red to green. The  $KC_{24}$  generated Cu NPs were highly stable to oxidation with no shift of the surface plasmon. Typically, the solubility of these NPs is aided by adding stabilising alkylamine ligands or surfactants;<sup>1</sup> in the present case no additional ligands or surfactants were added suggesting stabilisation may be provided to some extent by the amidic solvent. Further UV-vis and TEM investigations are required to ascertain the stabilising mechanism of the  $KC_{24}$  generated Cu NPs.

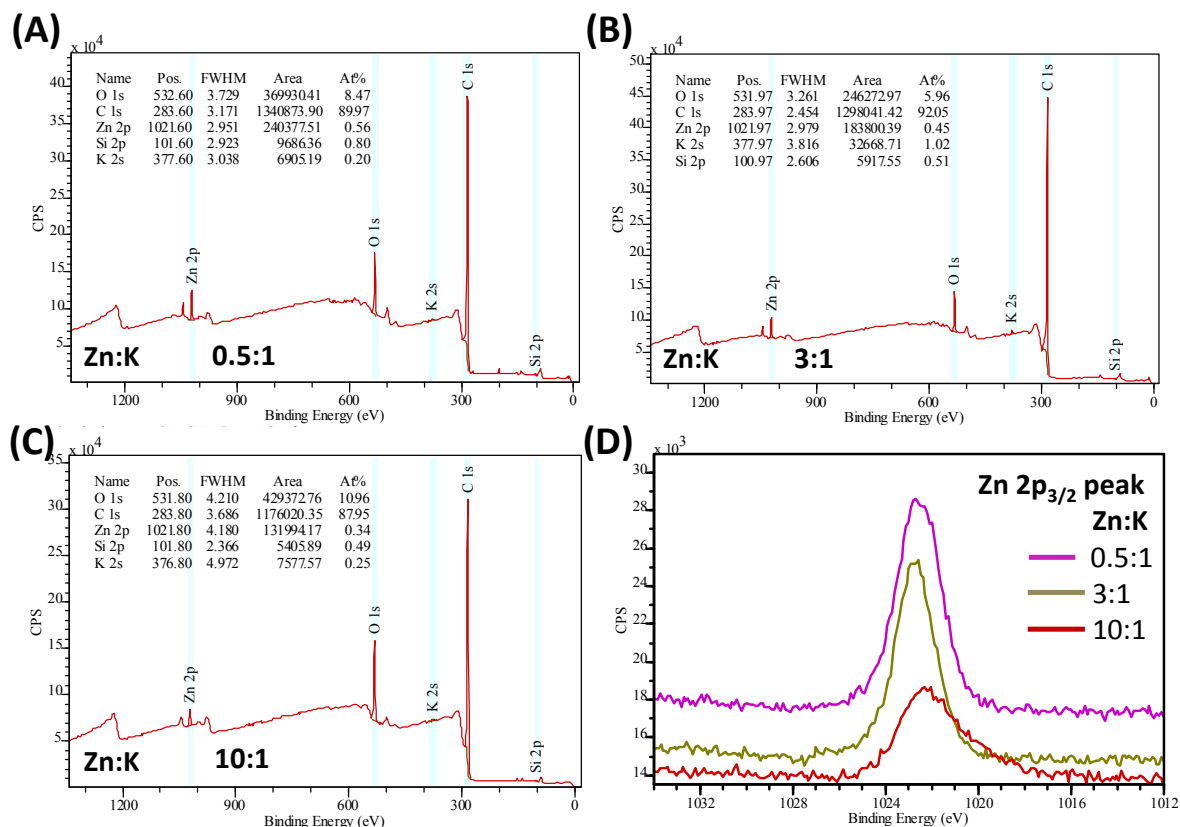

**Fig. S3** XPS survey spectra (A)-(C) for  $\text{KC}_8$  samples following reaction with  $\text{ZnCl}_2$  with varying  $\text{Zn}^{2+}:\text{K}$  stoichiometry. (D) High resolution scan of the  $\text{Zn } 2p_{3/2}$  region for the products (A)-(C).

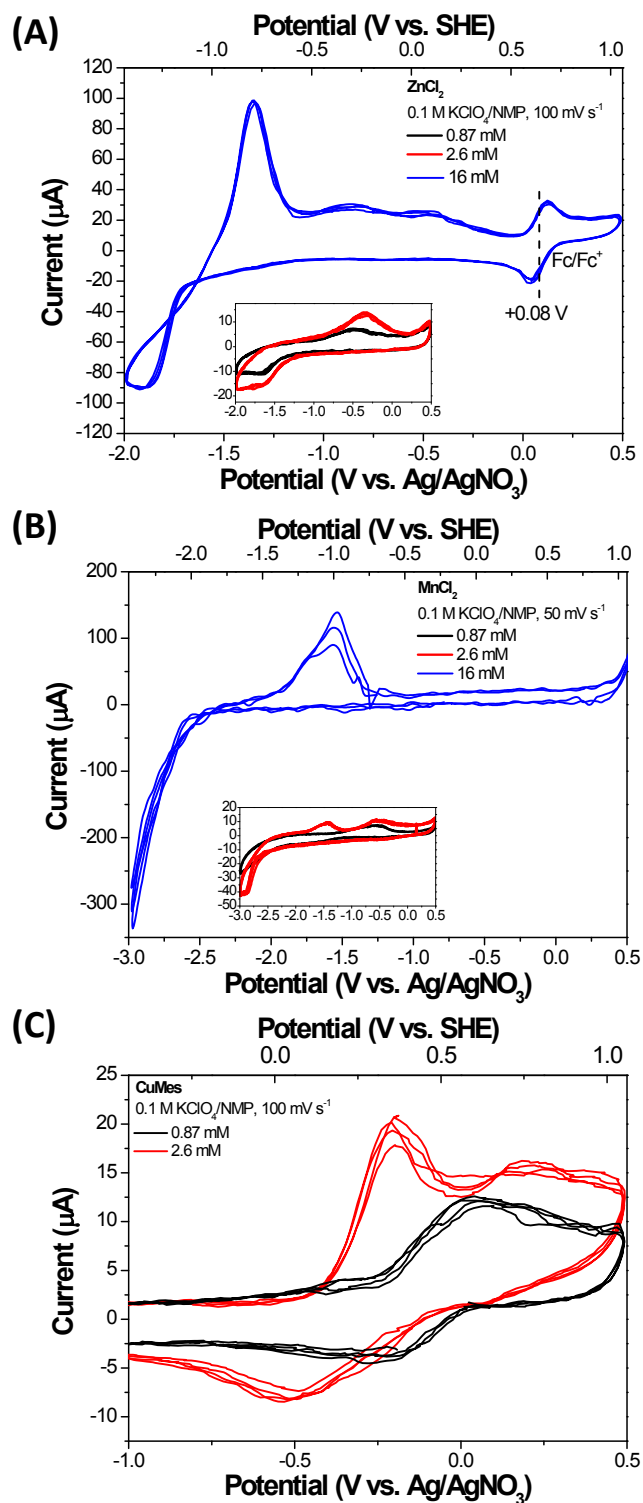

**Fig. S4** CV at a platinum working electrode of the metal salts/complexes used in this study in non-aqueous electrolyte (0.1 M KClO<sub>4</sub>/NMP). (A) 16 mM ZnCl<sub>2</sub> CV showing the Fc/Fc<sup>+</sup> reference; inset shows the redox activity at lower ZnCl<sub>2</sub> concentrations. (B) 16 mM MnCl<sub>2</sub> CV; inset shows the redox activity at lower MnCl<sub>2</sub> concentrations. (C) CuMes CV at 0.87 mM and 2.6 mM concentrations.

### **Derivation of metal salt/complex reduction potentials**

At low metal concentrations (0.87 mM / 2.6 mM typical of  $\text{KC}_{24}$  and  $\text{KC}_8$  reactions, respectively, where  $\text{Zn}^{2+}:\text{K}$  is 0:5:1), Nernstian behaviour is observed for the  $\text{ZnCl}_2$  with a redox potential  $\sim -1.06$  V *vs.*  $\text{Ag}/\text{AgNO}_3$  ( $-0.50$  V *vs.* SHE), however, at 16 mM ( $\text{Zn}^{2+}:\text{K}$ , 3:1 reaction), the voltammogram displays significant cathodic current due to zinc deposition<sup>2</sup> with an onset of  $\sim -1.69$  V *vs.*  $\text{Ag}/\text{AgNO}_3$  ( $-1.13$  V *vs.* SHE). For  $\text{MnCl}_2$  (Fig. S3B), it is difficult to determine the cathodic peak potential at 16 mM concentration, although the onset potential can be deduced as  $-2.57$  V *vs.*  $\text{Ag}/\text{AgNO}_3$  ( $-2.01$  V *vs.* SHE).  $\text{CuMes}$  voltammograms (Fig. S3C) showed distinct redox features centred  $\sim -0.12$  V *vs.*  $\text{Ag}/\text{AgNO}_3$  ( $+0.44$  V *vs.* SHE).

## References

1. C. Barriere, K. Piettre, V. Latour, O. Margeat, C.-O. Turrin, B. Chaudret and P. Fau, *J. Mater. Chem.*, 2012, **22**, 2279-2285.
2. Y. Yao, S. L. Xu, Y. Xia, Y. C. Yang, J. Liu, Z. L. Li and W. Huang, *Int. J. Electrochem. Sci.*, 2012, **7**, 3265-3273.
